# Supplementary material
Source: HighWire-hosted journal article supplement (https://jnm.snmjournals.org/highwire/filestream/123651/field_highwire_adjunct_files/0/268020_Supplemental_Data.pdf)
Supplement: 268020_Supplemental_Data.pdf [file 268020_Supplemental_Data.pdf]

### Supplemental Table 1: The 3TMPO investigators and collaborators

Five centres were activated for enrolling and imaging patients. Principal investigators are identified with \*.

| Participating site                                                                        | Investigator(s)                                                              | Collaborator(s)                                                                                                                                                                                                                      | Included patients |
|-------------------------------------------------------------------------------------------|------------------------------------------------------------------------------|--------------------------------------------------------------------------------------------------------------------------------------------------------------------------------------------------------------------------------------|-------------------|
| Centre Hospitalier<br>Universitaire de Québec<br>– Université Laval<br>Québec, QC, Canada | BEAUREGARD,<br>Jean-Mathieu*<br>POULIOT, Frédéric*                           | CASTONGUAY, Vincent<br>FRADET, Yves<br>LACOMBE, Louis<br>LEVESQUE, Éric<br>LODDE, Michele<br>MARCOUX, Nicolas<br>TOREN, Paul                                                                                                         | 66                |
| Centre Hospitalier<br>Universitaire de<br>Sherbrooke<br>Sherbrooke, QC, Canada            | GUÉRIN, Brigitte*<br>RICHARD, Patrick<br>ROUSSEAU, Etienne<br>TURCOTTE, Éric | BOISJOLY, Josie-Anne<br>CARMEL, Michel<br>CASTILLOUX, Jean-François<br>EKINDI-NDONGO, Nadia<br>JELDRES, Claudio<br>LACROIX-POISSON, Frédéric<br>NOËL-LAMY, Maxime<br>PAVIC, Michel<br>SABBAGH, Robert<br>TÉTREAU-LAFLAMME,<br>Audrey | 14                |
| Jewish General Hospital<br>Montreal, QC, Canada                                           | PROBST, Stephan<br>ANIDJAR, Maurice                                          | ABIKHZER, Gad<br>FERRARIO, Cristiano                                                                                                                                                                                                 | 2                 |
| Centre Hospitalier de<br>l'Université de Montréal<br>Montreal, QC, Canada                 | SAAD, Fred<br>TRUDEL,<br>Dominique                                           | ALBADINE, Roula<br>HAMILOU, Zineb<br>KARAKIEWICZ, Pierre I.<br>JUNEAU, Daniel<br>LATOUR, Mathieu<br>LATTOUF, Jean-Baptiste                                                                                                           | 16                |
| McGill University<br>Health Center<br>Montreal, QC, Canada                                | KASSOUF, Wassim                                                              | APRIKIAN, Armen<br>HICKESON, Marc                                                                                                                                                                                                    | 0                 |
| <b>Total</b>                                                                              |                                                                              |                                                                                                                                                                                                                                      | <b>98</b>         |

## Supplemental Table 2: Inclusion and Exclusion criteria

### Inclusion criteria

1. Male  $\geq 18$  years old
2. Histologically or cytologically proven adenocarcinoma of the prostate cancer with or without neuroendocrine carcinoma features at initial diagnosis
3. Castration-resistant prostate cancer defined by progression under continuous castration (measured serum testosterone  $\leq 50$  ng/dL [1.73 nM]) anytime while on androgen deprivation therapy
4. Metastatic disease documented by at least three metastatic active lesions on whole body bone scan\* and/or measurable soft tissue on CT-scan.\*\* Metastatic lesions on imaging are defined by RECIST 1.1
5. Evidence of disease progression (biochemical or radiographic) on prior therapy or watchful waiting
6. Able and willing to provide signed informed consent in French or English and to comply with protocol requirements

### Exclusion criteria

1. Another non-cutaneous malignancy or melanoma diagnosed in the past 5 years
2. Currently under a randomized controlled trial with unknown allocation
3. Limited survival prognosis (ECOG  $\geq 3$ )
4. Patients under dialysis
5. Any disease or condition limiting the patient's capacity to execute the study procedures, based on the investigators' opinion

\*A bone lesion that has been treated with site-directed radiation therapy is excluded from the target lesion count to fulfil the criteria of at least three metastatic lesions on conventional imaging.

\*\*The reference conventional imaging (confirming the presence of at least three active metastases) must be done either: a) after biochemical progression on treatment or b) at least 90 days after last treatment has begun if imaging was performed while the patient was still responding (to avoid disappearance of metastasis due to treatment response).

### Supplemental Table 3: Adverse events

Adverse events observed in the 3TMPO cohort (n=98), their severity (graded according to the Common Terminology Criteria for Adverse Events, version 5), their causality as assessed by the qualified doctor of the corresponding centre and their seriousness.

| Event        | Severity | Causality        | Seriousness | Occurrence |
|--------------|----------|------------------|-------------|------------|
| Headache     | Grade 1  | Possibly related | Not serious | 1          |
| Nausea       | Grade 1  | Possibly related | Not serious | 1          |
| Hyperthermia | Grade 1  | Possibly related | Not serious | 1          |
| Fall         | Grade 1  | Unrelated        | Not serious | 1          |
| Urosepsis    | Grade 3  | Unrelated        | Serious     | 1          |
| <b>Total</b> |          |                  |             | 5          |

**Supplemental Table 4: Systemic treatment categories received before accrual (excluding androgen deprivation therapy)**

| Type of treatment | Total (n=98) | No IIH (n=16) | With IIH (n=81) |
|-------------------|--------------|---------------|-----------------|
| <b>Taxanes*</b>   |              |               |                 |
| None              | 31 (31.6%)   | 6 (37.5%)     | 25 (30.9%)      |
| Docetaxel only    | 13 (13.3%)   | 2 (12.5%)     | 11 (13.6%)      |
| Cabazitaxel only  | 2 (2.0%)     | 0 (0.0%)      | 2 (2.5%)        |
| Both              | 52 (53.1%)   | 8 (50.0%)     | 43 (53.1%)      |
| <b>ARPI</b>       |              |               |                 |
| None              | 11 (11.2%)   | 3 (18.7%)     | 8 (9.9%)        |
| 1                 | 73 (74.5%)   | 12 (75.0%)    | 60 (74.1%)      |
| 2                 | 13 (13.3%)   | 0 (0.0%)      | 13 (16.0%)      |
| 3                 | 1 (1.0%)     | 1 (6.3%)      | 0 (0.0%)        |
| <b>Radium-223</b> | 16 (16.3%)   | 1 (6.3%)      | 15 (18.5%)      |
| <b>PARP-I</b>     | 6 (6.1%)     | 1 (6.3%)      | 5 (6.2%)        |
| <b>Other</b>      | 11 (11.2%)   | 3 (18.7%)     | 8 (9.9%)        |

ARPI : Androgen-receptor pathway inhibitor

IIH : intra-patient inter-metastatic heterogeneity

PARP-I : PolyADP-ribose polymerase inhibitor

\*Taxanes received as either hormone-sensitive or castration-resistant prostate cancer
